# Supplementary material for: Natural Product-Based Screening for Lead Compounds Targeting SARS CoV-2 Mpro
Source: MDPI journal article supplement (doi:10.3390/ph16050767), 2023-05-19
Supplement: s1 [file s1]

# Supplementary Materials

## Natural Product-Based Screening for Lead Compounds Targeting SARS CoV-2 M<sup>pro</sup>

Jie Chen <sup>1,2</sup>, Xiang Zhou <sup>3,4,\*</sup>, Lifeng Fu <sup>5,\*</sup> and Haiyu Xu <sup>1,3,\*</sup>

<sup>1</sup> Institute of Chinese Materia Medica, China Academy of Chinese Medical Sciences, Beijing 100700, China

<sup>2</sup> School of Chinese Medicine, Shenyang Pharmaceutical University, Shenyang 110016, China

<sup>3</sup> Key Laboratory for Research and Evaluation of Traditional Chinese Medicine, National Medical Products Administration, China Academy of Chinese Medical Sciences, Beijing 100700, China

<sup>4</sup> State Key Laboratory of Innovative Drug and Efficient Energy-Saving Pharmaceutical Equipment, Jiangxi University of Chinese Medicine, Nanchang 330004, China

<sup>5</sup> CAS Key Laboratory of Pathogenic Microbiology and Immunology, Institute of Microbiology, Chinese Academy of Sciences, Beijing 100101, China

\* Correspondence: flychow2001@163.com (X.Z.); fulf@im.ac.cn (L.F.); hyxu@icmm.ac.cn (H.X.)

| This Word file includes: | Page |
|--------------------------|------|
| Figure S1                | 2    |
| Figure S2                | 2    |
| Figure S3                | 3    |
| Figure S4                | 4    |
| Table S1                 | 5    |
| Table S2                 | 16   |

Supplementary Figure. S1

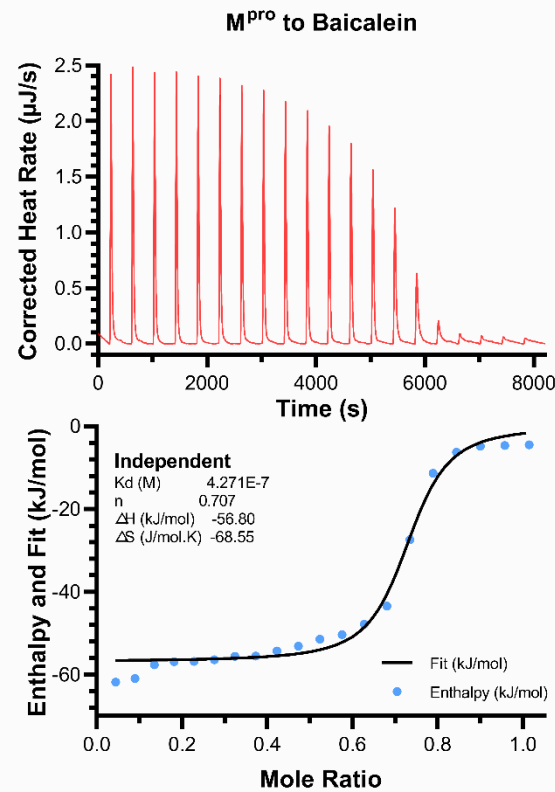

Figure S1. The Isothermal Titration Calorimetry result of M<sup>pro</sup> to Baicalein.

Supplementary Figure. S2

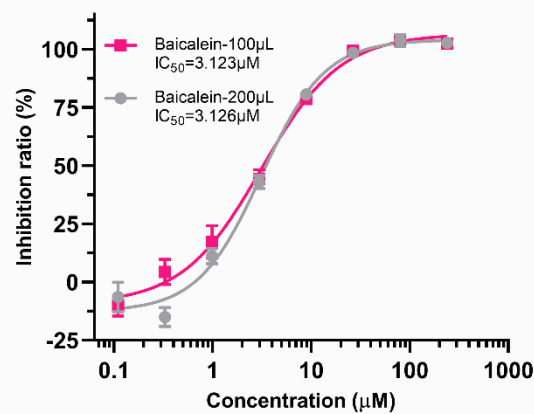

Figure S2. The IC<sub>50</sub> value and dose-effect relationship curve of baicalein at 100μL/200μL.

Supplementary Figure. S3

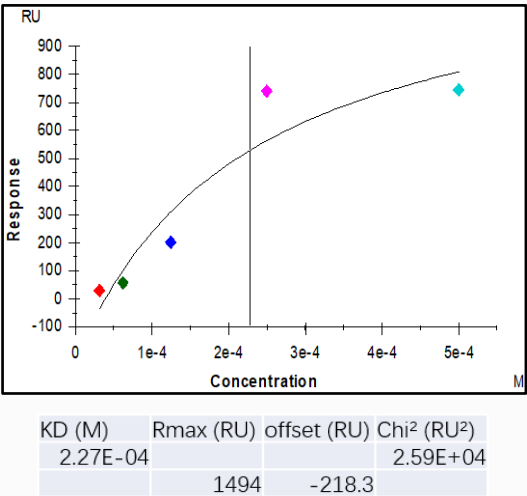

Figure S3. Steady analysis fitting curves for Ginkgolic Acid C15:1 to Mpro and related parameters.

## Supplementary Figure. S4

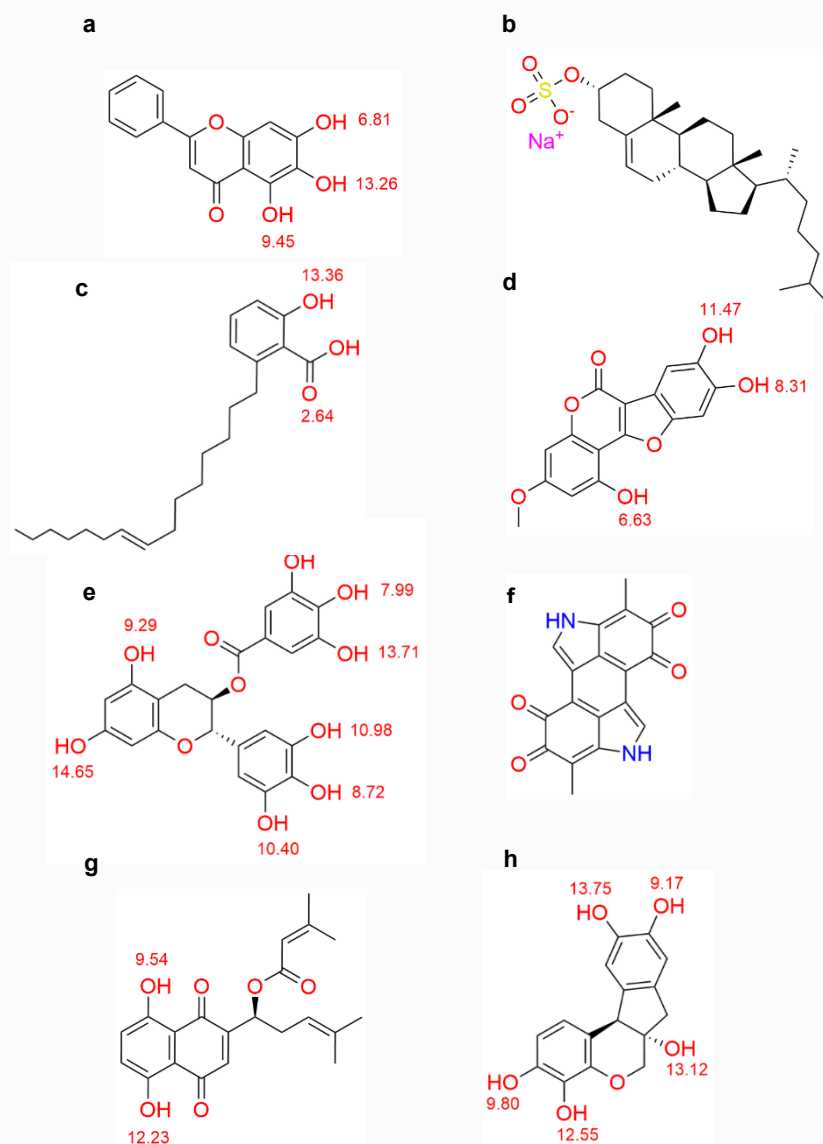

**Figure S4.** The pKa value of each group of the compound. (a) Baicalein, (b) Cholesteryl sodium sulfate, (c) Ginkgolic Acid C15:1, (d) Wedelolactone, (e) (-)-Gallocatechin Gallate, (f) Melanin, (g)  $\beta,\beta$ -Dimethylacrylalkannin, (h) Hematoxylin.

Supplementary Table S2.

| Serial number  | Name                             | CAS Number  | Structure                                                                            | Inhibition%(80μM) |         |        |
|----------------|----------------------------------|-------------|--------------------------------------------------------------------------------------|-------------------|---------|--------|
| 1. Flavonoids  |                                  |             |                                                                                      |                   |         |        |
| (1) flavanones |                                  |             |                                                                                      |                   |         |        |
| 1              | Corylifol A                      | 775351-88-7 | 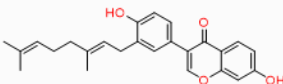    | 100.00%           | 100.01% | 99.99% |
| 2              | Baicalein                        | 491-67-8    |    | 99.94%            | 100.64% | 98.67% |
| 3              | 3,3',4',5,6,7-Hexahydroxyflavone | 90-18-6     |   | 99.40%            | 98.98%  | 98.10% |
| 4              | Myricetin                        | 529-44-2    |   | 90.64%            | 90.18%  | 90.28% |
| 5              | Scutellarein                     | 529-53-3    |   | 84.13%            | 85.01%  | 83.89% |
| 6              | Baicalin                         | 21967-41-9  |   | 77.46%            | 72.02%  |        |
| 7              | Breviscapin                      | 116122-36-2 |  | 66.01%            | 78.06%  | 77.78% |

|               |                              |            |                                                                                      |         |         |         |
|---------------|------------------------------|------------|--------------------------------------------------------------------------------------|---------|---------|---------|
| 8             | Gambogic Acid                | 2752-65-0  | 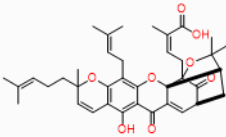    | 78.46%  | 78.61%  | 79.43%  |
| (2) catechins |                              |            |                                                                                      |         |         |         |
| 9             | (-)-Gallocatechin Gallate    | 4233-96-9  |     | 100.69% | 102.08% | 101.74% |
| 10            | (-)-Epigallocatechin Gallate | 989-51-5   |    | 82.60%  | 85.53%  | 79.02%  |
| 11            | (-)-Epigallocatechin         | 970-74-1   |   | 78.95%  | 75.28%  | 77.55%  |
| 12            | Theaflavine-3,3'-Digallate   | 33377-72-9 |  | 95.00%  | 94.93%  | 95.36%  |
| 13            | Theaflavin 3,3'-Digallate    | 30462-35-2 |   | 89.63%  | 87.11%  | 89.52%  |

## 2. Lipids

### (1) fatty acids

|    |                       |            |                                                                                      |         |         |         |
|----|-----------------------|------------|--------------------------------------------------------------------------------------|---------|---------|---------|
| 14 | Eicosadienoic Acid    | 2091-39-6  | 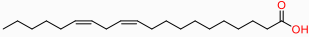   | 104.73% | 103.14% | 107.18% |
| 15 | Petroselinic Acid     | 593-39-5   |    | 103.91% | 105.29% | 103.73% |
| 16 | Oleic Acid            | 112-80-1   |    | 103.98% | 104.37% | 103.27% |
| 17 | Palmitoleic Acid      | 373-49-9   |    | 102.92% | 103.78% | 102.80% |
| 18 | 10Z-Nonadecenoic acid | 73033-09-7 |   | 126.52% | 101.02% | 101.53% |
| 19 | Erucic Acid           | 112-86-7   |  | 100.63% | 99.68%  | 100.48% |
| 20 | Pentadecanoic Acid    | 1002-84-2  |  | 92.31%  | 92.58%  | 91.46%  |
| 21 | Nervonic Acid         | 506-37-6   |  | 93.60%  | 89.75%  | 93.14%  |
| 22 | Myristic Acid         | 544-63-8   |  | 85.01%  | 82.11%  | 84.30%  |
| 23 | Elaidic Acid          | 112-79-8   |  | 74.89%  | 79.40%  | 87.31%  |
| 24 | Arachidonic Acid      | 506-32-1   |  | 82.20%  | 76.72%  | 73.70%  |

### (2) phosphates

|    |             |         |                                                                                   |        |        |        |
|----|-------------|---------|-----------------------------------------------------------------------------------|--------|--------|--------|
| 25 | Phytic Acid | 83-86-3 | 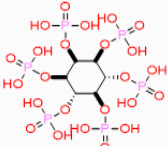 | 97.60% | 97.45% | 98.02% |
|----|-------------|---------|-----------------------------------------------------------------------------------|--------|--------|--------|

### 3. Phenylpropanoids

|    |               |          |                                                                                   |         |         |         |
|----|---------------|----------|-----------------------------------------------------------------------------------|---------|---------|---------|
| 26 | Wedelolactone | 524-12-9 | 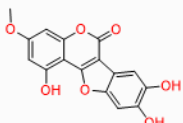 | 101.95% | 101.88% | 102.36% |
|----|---------------|----------|-----------------------------------------------------------------------------------|---------|---------|---------|

|    |                          |             |                                                                                   |        |        |        |
|----|--------------------------|-------------|-----------------------------------------------------------------------------------|--------|--------|--------|
| 27 | Isodemethylwedelolactone | 350681-33-3 | 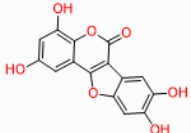 | 99.67% | 99.38% | 99.79% |
|----|--------------------------|-------------|-----------------------------------------------------------------------------------|--------|--------|--------|

|    |          |          |                                                                                    |        |        |        |
|----|----------|----------|------------------------------------------------------------------------------------|--------|--------|--------|
| 28 | Fraxetin | 574-84-5 | 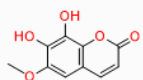 | 96.84% | 97.85% | 96.97% |
|----|----------|----------|------------------------------------------------------------------------------------|--------|--------|--------|

|    |                   |          |                                                                                     |        |        |        |
|----|-------------------|----------|-------------------------------------------------------------------------------------|--------|--------|--------|
| 29 | 4-Methylesculetin | 529-84-0 | 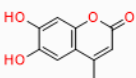 | 79.12% | 79.87% | 77.57% |
|----|-------------------|----------|-------------------------------------------------------------------------------------|--------|--------|--------|

|    |          |           |                                                                                     |        |        |        |
|----|----------|-----------|-------------------------------------------------------------------------------------|--------|--------|--------|
| 30 | Carnosol | 5957-80-2 | 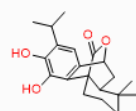 | 74.48% | 73.35% | 80.59% |
|----|----------|-----------|-------------------------------------------------------------------------------------|--------|--------|--------|

### 4. Phenols

#### (1) binary phenols and glycosides

|    |             |             |                                                                                      |         |         |         |
|----|-------------|-------------|--------------------------------------------------------------------------------------|---------|---------|---------|
| 31 | Kukoamine B | 164991-67-7 | 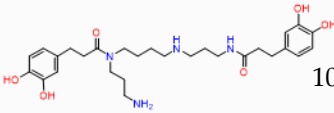 | 104.18% | 103.22% | 104.32% |
|----|-------------|-------------|--------------------------------------------------------------------------------------|---------|---------|---------|



|    |                                 |              |                                                                                      |         |         |         |
|----|---------------------------------|--------------|--------------------------------------------------------------------------------------|---------|---------|---------|
| 32 | 1,5-Dicaffeoylquinic Acid       | 30964-13-7   | 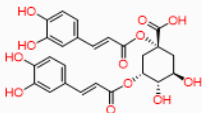    | 74.57%  | 75.61%  | 71.24%  |
| 33 | Hydroxytyrosol Acetate          | 69039-02-7   |     | 102.98% | 103.09% | 102.91% |
| 34 | 4-Methylcatechol                | 452-86-8     |     | 102.69% | 102.51% | 102.92% |
| 35 | 3,4-Dihydroxyphenyl ethanol     | 10597-60-1   |     | 101.17% | 102.33% | 102.25% |
| 36 | Osmundacetone                   | 37079-84-8   |     | 98.66%  | 98.31%  | 98.46%  |
| 37 | Hydrocaffeic Acid               | 1078-61-1    |     | 88.27%  | 90.29%  | 90.08%  |
| 38 | 3,4-Dihydroxyphenyl acetic Acid | 102-32-9     |   | 72.40%  | 71.59%  | 70.57%  |
| 39 | Rosmarinic Acid                 | 20283-92-5   |  | 46.31%  | 76.08%  | 69.63%  |
| 40 | 9'-Methyl Lithospermate B       | 1167424-31-8 |  | 73.57%  | 72.67%  | 74.36%  |
| 41 | Gnetol                          | 86361-55-9   |   | 81.51%  | 81.39%  | 81.62%  |
| 42 | Hematoxylin                     | 517-28-2     |   | 103.72% | 103.56% | 103.03% |

|    |                                                                           |              |                                                                                      |         |         |         |
|----|---------------------------------------------------------------------------|--------------|--------------------------------------------------------------------------------------|---------|---------|---------|
| 43 | Brazilin                                                                  | 474-07-7     | 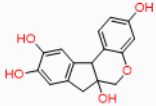    | 100.86% | 101.06% | 101.28% |
| 44 | (7S)-3,7,10,11-Tetrahydroxy-7,8-dihydro-6H-dibenzo[b,d]oxocine-7-methanol | 102036-29-3  |     | 101.15% | 101.14% | 101.45% |
| 45 | Forsythoside E                                                            | 93675-88-8   |    | 103.35% | 102.62% | 100.37% |
| 46 | Plantainoside D                                                           | 147331-98-4  |    | 101.38% | 99.79%  | 99.90%  |
| 47 | Isoforsythiaside                                                          | 1357910-26-9 |  | 100.42% | 100.44% | 101.30% |
| 48 | Arenarioside                                                              | 94130-58-2   |   | 99.11%  | 99.86%  | 99.31%  |
| 49 | Oleuropein                                                                | 32619-42-4   |   | 96.62%  | 97.72%  |         |

|    |                              |             |                                                                                      |        |        |        |
|----|------------------------------|-------------|--------------------------------------------------------------------------------------|--------|--------|--------|
| 50 | Plantamajoside               | 104777-68-6 | 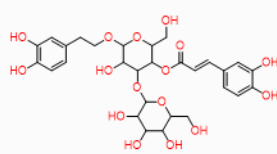   | 93.60% | 93.95% | 92.47% |
| 51 | Forsythoside B               | 81525-13-5  |    | 92.91% | 95.11% | 93.46% |
| 52 | Desrhamnosyl<br>Isoacteoside | 105471-98-5 |    | 93.35% | 94.40% | 92.55% |
| 53 | Echinacoside                 | 82854-37-3  |   | 93.62% | 90.06% | 89.84% |
| 54 | 2'-Acetylacteoside           | 94492-24-7  |  | 90.56% | 93.37% | 90.77% |
| 55 | Tubuloside A                 | 112516-05-9 |  | 87.62% | 90.37% | 86.87% |
| 56 | Forsythoside A               | 79916-77-1  |  | 77.01% | 73.60% | 71.69% |

(2) ternary  
phenols and  
glycosides

|                     |                         |            |                                                                                      |         |         |         |
|---------------------|-------------------------|------------|--------------------------------------------------------------------------------------|---------|---------|---------|
| 57                  | Propyl Gallate          | 121-79-9   | 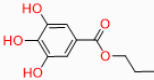    | 78.46%  | 78.61%  | 79.43%  |
| 58                  | Corilagin               | 23094-69-1 |    | 100.82% | 101.84% | 101.22% |
| 59                  | Tannic Acid             | 1401-55-4  |    | 89.58%  | 88.66%  | 87.66%  |
| 60                  | Geraniin                | 60976-49-0 |   | 71.62%  | 70.07%  | 71.11%  |
| 61                  | Punicalagin             | 65995-63-3 |   | 75.03%  | 73.51%  | 73.40%  |
| (3) salicylic acids |                         |            |                                                                                      |         |         |         |
| 62                  | Ginkgolic Acid<br>C15:1 | 22910-60-7 |  | 103.73% | 107.06% | 103.73% |

|                        |                                                                                                                 |             |                                                                                     |         |         |         |
|------------------------|-----------------------------------------------------------------------------------------------------------------|-------------|-------------------------------------------------------------------------------------|---------|---------|---------|
| 63                     | Ginkgolic Acid<br>C17:1                                                                                         | 111047-30-4 | 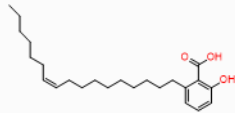   | 102.36% | 100.63% | 101.61% |
| 5. Quinones            |                                                                                                                 |             |                                                                                     |         |         |         |
| (1)<br>benzoquinones   |                                                                                                                 |             |                                                                                     |         |         |         |
| 64                     | 2,6-Dimethylbenzoquinone                                                                                        | 527-61-7    |    | 101.69% | 101.34% | 101.15% |
| 65                     | Embelin                                                                                                         | 550-24-3    |    | 102.98% | 89.75%  | 99.35%  |
| (2)<br>naphthoquinones |                                                                                                                 |             |                                                                                     |         |         |         |
| 66                     | $\beta,\beta$ -Dimethylacrylalkannin                                                                            | 34539-65-6  |  | 100.45% | 99.09%  | 97.96%  |
| 67                     | 3-(Acetyloxy)-3-methylbutanoic acid (1S)-1-(1,4-dihydro-5,8-dihydroxy-2-naphthalenyl)-4-methyl-3-pentenyl ester | 69091-17-4  |  | 93.12%  | 92.58%  | 93.44%  |
| 68                     | ( $\pm$ )-Shikonin                                                                                              | 54952-43-1  |  | 87.60%  | 95.04%  | 93.71%  |
| 69                     | Deoxyshikonin                                                                                                   | 43043-74-9  |  | 82.31%  | 88.46%  | 84.98%  |

|                       |                                         |            |                                                                                     |        |        |        |
|-----------------------|-----------------------------------------|------------|-------------------------------------------------------------------------------------|--------|--------|--------|
| 70                    | ( $\beta,\beta$ -Dimethylacryl)Shikonin | 24502-79-2 | 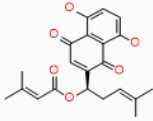   | 82.39% | 82.91% | 82.80% |
| 71                    | 5-Hydroxy-1,4-naphthalenedione          | 481-39-0   |    | 82.51% | 81.21% | 82.92% |
| 72                    | $\beta,\beta$ -dimethylacrylshikonin    | 5162-01-6  |    | 75.31% | 77.34% | 77.10% |
| 73                    | Plumbagin                               | 481-42-5   |    | 70.20% | 74.76% | 75.47% |
| (3)<br>anthraquinones |                                         |            |                                                                                     |        |        |        |
| 74                    | Anthraquinone-2-Carboxylic Acid         | 117-78-2   |  | 85.44% | 84.57% |        |

## 6. Alkaloids

### (1) isoquinolines

|    |                       |           |                                                                                     |         |         |  |
|----|-----------------------|-----------|-------------------------------------------------------------------------------------|---------|---------|--|
| 75 | Sanguinarine chloride | 5578-73-4 | 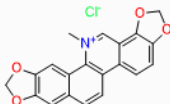 | 108.35% | 108.15% |  |
|----|-----------------------|-----------|-------------------------------------------------------------------------------------|---------|---------|--|

|                  |                        |            |                                                                                     |         |         |         |
|------------------|------------------------|------------|-------------------------------------------------------------------------------------|---------|---------|---------|
| 76               | Sanguinarine           | 2447-54-3  | 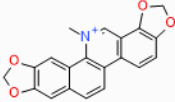   | 107.86% | 107.40% | 108.34% |
| 77               | Chelerythrine          | 34316-15-9 |    | 99.38%  | 98.97%  | 99.51%  |
| 78               | Chelerythrine chloride | 3895-92-9  |    | 98.66%  | 98.31%  | 98.46%  |
| (2) pyrrolidines |                        |            |                                                                                     |         |         |         |
| 79               | Maleimide              | 541-59-3   |   | 103.98% | 104.37% | 103.27% |
| 80               | Melanin                | 8049-97-6  |  | 95.85%  | 96.84%  | 96.92%  |
| 81               | Harmol                 | 487-03-6   |  | 74.50%  | 81.33%  | 79.31%  |
| (3) morpholines  |                        |            |                                                                                     |         |         |         |
| 82               | Vanitilide             | 17692-71-6 |  | 99.14%  | 99.16%  | 98.95%  |

## 7. Terpenoids and Steroids

|    |                            |            |                                                                                    |         |         |         |
|----|----------------------------|------------|------------------------------------------------------------------------------------|---------|---------|---------|
| 83 | Cholesteryl sodium sulfate | 2864-50-8  | 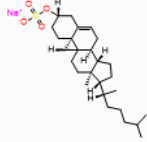  | 100.46% | 100.30% | 100.48% |
| 84 | Oridonin                   | 28957-04-2 |   | 84.28%  | 83.80%  | 85.60%  |
| 85 | Celastrol                  | 34157-83-0 |   | 89.61%  | 85.83%  | 91.32%  |
| 86 | Ziyuglycoside II           | 35286-59-0 |  | 70.21%  | 74.61%  | 47.27%  |

**Table S2.** 86 compounds obtained from the repeat sieve and their inhibition rates.



**Supplementary Table S3.**

| Capillary ID | Sample ID                               | Concentration( $\mu$ M) | T <sub>m</sub> (°C) | $\Delta$ T |
|--------------|-----------------------------------------|-------------------------|---------------------|------------|
| 1            | Mpro                                    | /                       | 55.3°C              | /          |
| 2            | Mpro                                    | /                       | 55.3°C              | /          |
| 3            | Mpro+DMSO(1)                            | 0                       | 54.9°C              | /          |
| 4            | Mpro+DMSO(2)                            | 0                       | 54.9°C              | /          |
| 5            | Baicalein(1)                            | 3.125                   | 55.2°C              | 0.3°C      |
| 6            | Baicalein(2)                            | 12.5                    | 55.6°C              | 0.7°C      |
| 7            | Baicalein(3)                            | 50                      | 56.6°C              | 1.7°C      |
| 8            | Baicalein(4)                            | 200                     | 57.0°C              | 2.1°C      |
| 17           | Cholesterol sodium sulfate(1)           | 3.125                   | 55.0°C              | 0.1°C      |
| 18           | Cholesterol sodium sulfate(2)           | 12.5                    | 55.0°C              | 0.1°C      |
| 19           | Cholesterol sodium sulfate(3)           | 50                      | 54.1°C              | -0.8°C     |
| 20           | Cholesterol sodium sulfate(4)           | 200                     | 48.9°C              | -6.0°C     |
| 25           | Wedelolactone(1)                        | 3.125                   | 55.2°C              | 0.3°C      |
| 26           | Wedelolactone(2)                        | 12.5                    | 55.4°C              | 0.5°C      |
| 27           | Wedelolactone(3)                        | 50                      | 55.8°C              | 0.9°C      |
| 28           | Wedelolactone(4)                        | 200                     | 56.1°C              | 1.2°C      |
| 33           | Melanin(1)                              | 3.125                   | 55.0°C              | 0.1°C      |
| 34           | Melanin(2)                              | 12.5                    | 54.9°C              | 0.0°C      |
| 35           | Melanin(3)                              | 50                      | 54.9°C              | 0.0°C      |
| 36           | Melanin(4)                              | 200                     | 54.4°C              | -0.5°C     |
| 43           | $\beta,\beta$ -dimethylacrylalkannin(1) | 12.5                    | 55.1°C              | 0.2°C      |
| 44           | $\beta,\beta$ -dimethylacrylalkannin(2) | 50                      | 57.7°C              | 2.8°C      |
| 45           | $\beta,\beta$ -dimethylacrylalkannin(3) | 200                     | 58.3°C              | 3.4°C      |

**Table S3.** T<sub>m</sub> values for M<sup>pro</sup> in the presence of different compounds.
